# Supplementary material for: Biallelic mutations in PALB2 cause Fanconi anemia subtype FA-N and predispose to childhood cancer
Source: Springer Nature journal article supplement (doi:10.1038/ng1947), 2006-12-31
Supplement: ng1947-S2.pdf [file ng1947-S2.pdf]

**Supplementary Table 1**Primers and PCR conditions for *PALB2* coding exons

| Exon | Primer Sequence 5'-3'     |                               | Size(bp) | PCR   |
|------|---------------------------|-------------------------------|----------|-------|
|      | Forward                   | Reverse                       |          |       |
| 1    | GGATTTAATTGGCCGGAGTT      | GACACAAAGCCAGGCCTAAA          | 309      | 68-50 |
| 2-3  | ACCTTTCACCTTGCCCAGTA      | GGGAAAAAGAACAATAGCCAAA        | 400      | 68-50 |
| 4A   | GCCTGAATGAAATGTCCTGATT    | GGTGATCTAGCAGGATTTTGC         | 495      | 68-50 |
| 4B   | CCCTAGTGGTGAGCAAAAGC      | TTCAAGGTGCTGACTACTACCG        | 388      | 68-50 |
| 4C   | ACCAACTGCCCAACCAGA        | TGGTTTTCATTTGCTGGTAAG         | 357      | 68-50 |
| 4D   | AAGTAAAAGTGGCCAACTGC      | TTTTTCTTGACATCCAAATGACTC      | 387      | 68-50 |
| 4E   | GCAGAAAAACATTCTTGACACA    | AAGGAAGTGCCAGGCAAATA          | 600      | 68-50 |
| 5A   | GATTGTCTGTTTTGTTGGGTTT    | GGTCCTCTTCTAAGTCCTCCATT       | 395      | 68-50 |
| 5B   | AAAGAGGGAAGCTGTATTTTCC    | CTGCCTGAACTGTCGAATTG          | 398      | 68-50 |
| 5C   | CACCTGCTTTCCCATCTTA       | GGCATTTCATTCTTCAGAGA          | 389      | 68-50 |
| 6    | AGTGGGTAATGCAGGCAGAC      | TGACTGAATTCTTTTCAGTTCATT      | 213      | 68-50 |
| 7    | TGCTTTCATATAAACAGCACT     | TGGTAAGCTGCCCATCTACA          | 293      | 68-50 |
| 8    | TGGAAAATCTGGATTAAACAAAAA  | TGCACTTAAAACCAGCTGACA         | 221      | 68-50 |
| 9    | ATTAAAAGGTTACTCCTCACATCAC | CCCAACTTTCTCTGAAACCTGT        | 287      | 68-50 |
| 10   | CCTAGAGACTGCTTTAGTGCAAA   | TTCACAACAACCCTGTAAAATTAG      | 250      | 68-50 |
| 11   | TTTTCTGAATACTGGTTTGTGGA   | CGGGGAAGGTTTGTTCATTA          | 244      | 68-50 |
| 12   | TGCCAGATCTTTATTTTTCCTGA   | TGTGTTTGCACAGTGCCTTT          | 281      | 68-50 |
| 13   | TGGTTTTGGGAACATGGTTT      | TTAAGTGTTCATTTCAGATATTCTCCTTT | 400      | 68-50 |
